# Supplementary material for: In situ preparation of a MOF-derived magnetic carbonaceous catalyst for visible-light-driven hydrogen evolution
Source: Royal Society of Chemistry journal article supplement (doi:10.1039/c5ra23838b), 2015-12-21
Supplement: c5ra23838b1.pdf [file c5ra23838b1.pdf]

## Electronic Supplementary Information

### ***In Situ* Preparation of MOF-derived Magnetic Carbonaceous Catalyst for Visible-Light-Driven Hydrogen Evolution**

**Jing-Yin Xu,<sup>a,†</sup> Xin-Ping Zhai,<sup>a,†</sup> Lin-Feng Gao,<sup>a</sup> Peng Chen,<sup>b</sup> Min Zhao,<sup>a</sup> Hong-Bin Yang,<sup>a</sup> Deng-Feng Cao,<sup>a</sup> Qiang Wang<sup>\*a</sup> and Hao-Li Zhang <sup>\*a</sup>**

<sup>a</sup> State Key Laboratory of Applied Organic Chemistry (SKLAOC), Key Laboratory of Nonferrous Metal Chemistry and Resources Utilization of Gansu Province, College of Chemistry and Chemical Engineering, Key Laboratory of Special Function Materials and Structure Design, Ministry of Education, Lanzhou University, Lanzhou, 730000, China

<sup>b</sup> School of Pharmacy, Lanzhou University, Lanzhou, 730020, China

\*Corresponding authors. E-mail: qiangwang@lzu.edu.cn (Qiang Wang), haoli.zhang@lzu.edu.cn (Hao-Li Zhang)

† The authors equally contributed to the manuscript.

### The XRD patterns of MIL-101(Fe), Cat. and Cat. digested by HCl

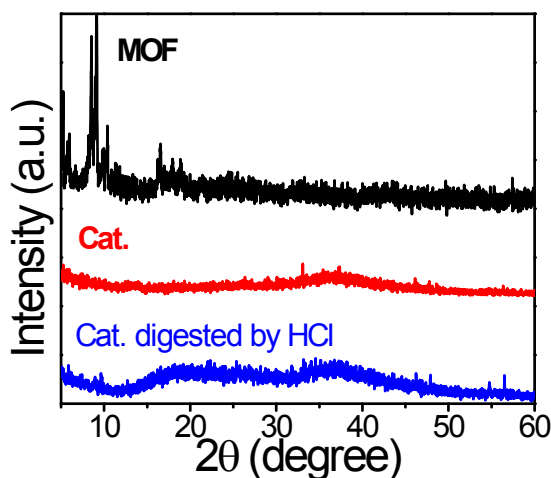

**Figure S1.** The XRD patterns of MIL-101(Fe), Cat. and Cat. decomposed. The diffraction peaks of MIL-101(Fe) are consistent with the literature,<sup>1</sup> reflecting a crystalline structure. For the catalyst however XRD peaks corresponding to crystalline phases of carbon or Fe phase can not be clearly identified. XRD patterns of Cat. decomposed implied amorphous carbon.

### Quantum Efficiency (QE) calculation procedures

The quantum yield for H<sub>2</sub> generation was calculated using the following equation (1):<sup>2</sup>

$$Q (\%) = \frac{n \times N(\text{H}_2)}{N(\text{photons})} \times 100 \quad \text{eq. (1)}$$

where the electron factor  $n$  of the reaction ( $2\text{H}^+ + 2\text{e}^- \rightarrow \text{H}_2$ ) is 2, and  $N(\text{H}_2)$  is the number of produced H<sub>2</sub> molecules. Hydrogen production was calculated from the amount of H<sub>2</sub> produced from the first 6 h of light irradiation.  $N(\text{photons})$  is the number of absorbed photons during the H<sub>2</sub> evolution and are calculated by the following equation (2):

$$N(\text{photons}) = I \times t \times S \times Q \quad \text{eq. (2)}$$

where  $t$  is irradiation time (s),  $S$  is the effective light irradiation area (m<sup>2</sup>), and  $Q$  is the photon

flux of the incident light (number of photons  $\text{m}^{-2} \text{s}^{-1}$ ).  $Q$  was measured using a radiometer (FZ-A, Opto-electronic Instrument of Beijing Normal University, light spectrum, 400–1000 nm). The average QE for the catalyst was calculated with uncertainties based on the multiple measurements. The spectral distribution of the white-light LED source is shown in Figure S2, which ranges the whole visible region from 400 to 750 nm without any filter.

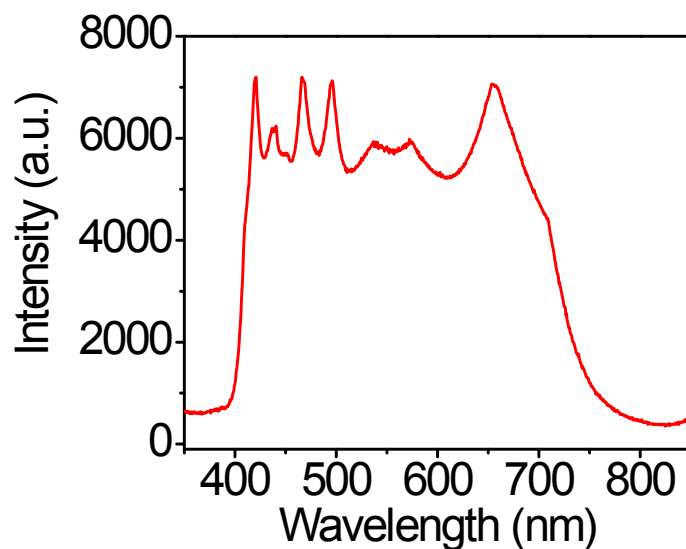

**Figure S2** The spectral distribution of white-light LED source without any filter.

### Deuteration experiments

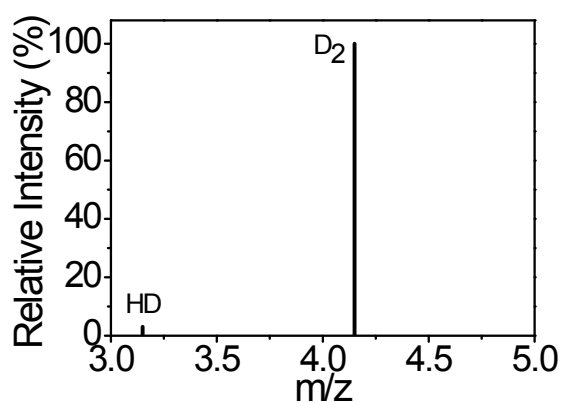

**Figure S3** The Mass Spectrum of the produced gas mixture when water was replaced by deuterium oxide in the photocatalysis.

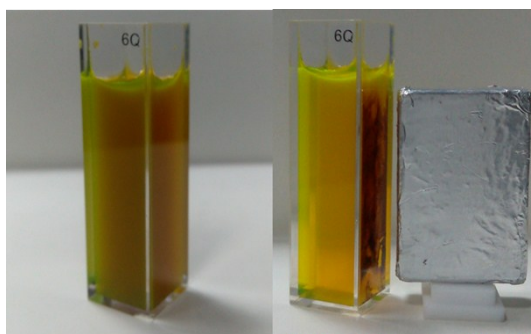

**Figure S4** The catalyst exhibited magnetic behaviors and can be conveniently recycled by an external magnet. The right picture clearly showed an external magnet attracted the catalyst in the solution (left) to the one wall of the cuvette.

### Synthesis, characterization and photoactivities of MIL-53(Fe)

Based on previous literatures,<sup>3</sup> MIL-53(Fe) was prepared by dissolving 0.270 g (1 mmol) of  $\text{FeCl}_3 \cdot 6\text{H}_2\text{O}$  and 0.166 g (1 mmol) of BDC in 5 mL of DMF. The mixture was then introduced into a 50 mL Teflon-lined microwave vessel and sealed. The reaction was then rapidly heated to 150 °C at 300 W, and was held at this temperature for 30 minutes. After cooling to room temperature, the particles were isolated by centrifuging, and were washed with DMF and ethanol.

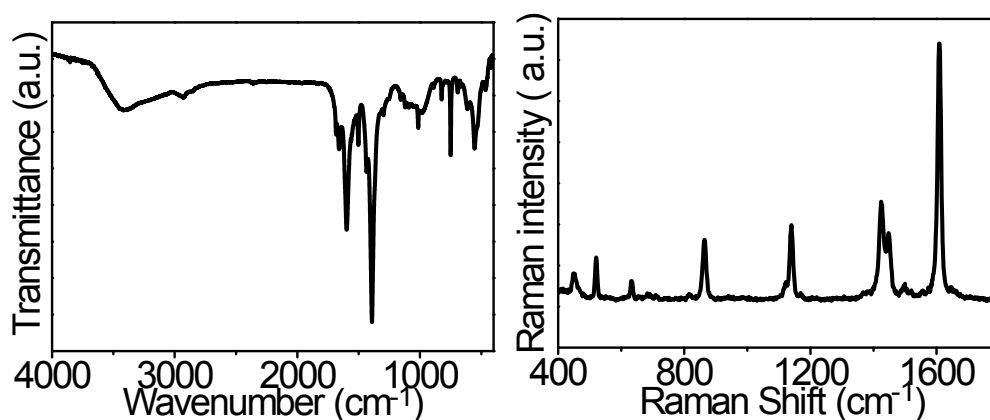

**Figure S5** The FTIR (left) and Raman spectra (Raman) of the as-prepared MIL-53(Fe). The characteristic bands are consistent with those reported in literatures,<sup>3</sup> indicating a successful synthesis.

By use of MIL-53(Fe) as the precursor, a catalyst with a higher carbon content (weight ratio of 4.5%) than that of MIL-101(Fe)-derived catalyst was obtained. The  $\text{H}_2$  evolution

efficiency of this as-prepared catalyst was ~48  $\mu\text{mol}$  gas produced within 5 h using 5 mg MOFs precursors, decreasing to less than half of that from MIL-101(Fe) derived catalyst under identical conditions.

### Fitting methods for laser photolysis experiments

Transient decay measurements at a single wavelength detected by PMT detectors were used to extract lifetime components of relevant samples. Each probe wavelength can be fitted by a sum of up to four exponentials with a least-squares-fitting program. The exponential growth or decay process can be expressed in mathematical terms as the following equation (3):

$$I(t) = c_0 + c_1 e^{-t/\tau_1} + c_2 e^{-t/\tau_2} + c_3 e^{-t/\tau_3} + c_4 e^{-t/\tau_4} \quad \text{eq. (3)}$$

where  $I(t)$  is the decay model reflecting the response of the sample to an infinitely short excitation, and  $c_0$  is the background,  $c_1, c_2, c_3, c_4$  the pre-exponential factors reflecting the weight of corresponding characteristic lifetime components of  $\tau_1, \tau_2, \tau_3$  and  $\tau_4$ , respectively. Positive pre-exponential factors indicate decay processes whereas negative values are characteristic for growth processes.

**Table S1** Tabulated fitting results of lifetime components for the above samples. The percentage numbers in parentheses indicate the corresponding weight ratio of extracted lifetime components and those rise times are specified.

| Sample                   | 403 nm $\tau$ (EY <sup>-</sup> )                   | 460 nm $\tau$ (EY <sup>+</sup> )                        | 560 nm $\tau$ ( <sup>3</sup> EY <sup>*</sup> ) |
|--------------------------|----------------------------------------------------|---------------------------------------------------------|------------------------------------------------|
| EY                       |                                                    |                                                         | 132 $\mu\text{s}$ (100%)                       |
| EY+C <sub>at</sub> .     |                                                    | 18 $\mu\text{s}$ (rise, 52%)<br>248 $\mu\text{s}$ (48%) | 31 $\mu\text{s}$ (100%)                        |
| EY+TEA                   | 12 $\mu\text{s}$ (rise, 53%)<br>Long, > 6 ms (47%) |                                                         | 32 $\mu\text{s}$ (100%)                        |
| EY+C <sub>at</sub> .+TEA | 19 $\mu\text{s}$ (rise, 57%)<br>long, > ms(43%)    | Long, (> ms)                                            | 26 $\mu\text{s}$ (100%)                        |

### Band gap determination of MIL-101 (Fe)

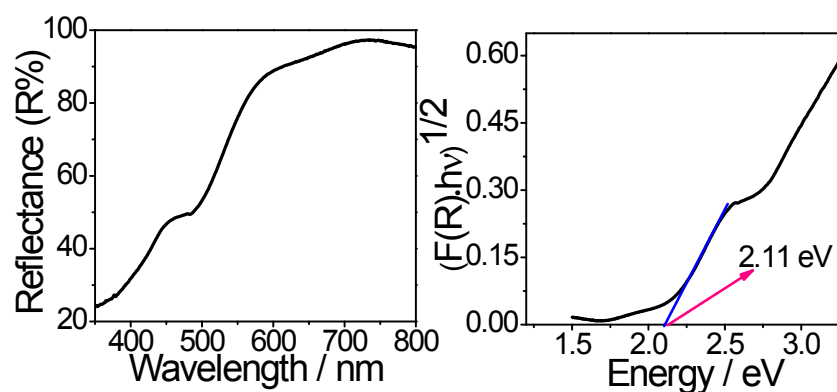

**Figure S6** The UV/VIS diffuse reflectance spectra (left) and corresponding Tauc plot (right) of MIL-101 (Fe).

### References

1. Maksimchuk, N. V.; Kovalenko, K. A.; Fedin, V. P.; Kholdeeva, O. A., *Chem. Commun.* **2012**, 48 (54), 6812-6814.
2. (a) Yu, S.; Kim, Y. H.; Lee, S. Y.; Song, H. D.; Yi, J., *Angew. Chem., Int. Ed.* **2014**, 53 (42), 11203-7; (b) Min, S.; Lu, G., *J. Phys. Chem. C* **2012**, 116 (37), 19644-19652; (c) Das, A.; Han, Z.; Haghighi, M. G.; Eisenberg, R., *Proc. Natl. Acad. Sci. U.S.A.* **2013**, 110 (42), 16716-16723.
3. (a) Gordon, J.; Kazemian, H.; Rohani, S., *Microporous Mesoporous Mater.* **2012**, 162, 36-43; (b) Zhang, Y.; Li, G.; Lu, H.; Lv, Q.; Sun, Z., *Rsc Adv.* **2014**, 4 (15), 7594.
